# Supplementary material
Source: publisher figshare collection journal article supplement (https://acs.figshare.com/ndownloader/files/5792112)
Supplement: Supplementary file 1 [file 5792112]

## Supporting Information

### **pH-Sensitive ZnO quantum dots-doxorubicin nanoparticles for lung cancer targeted drug delivery**

*Xiaoli Cai,<sup>†</sup> Yanan Luo,<sup>†,‡</sup> Weiying Zhang,<sup>§</sup> Dan Du,<sup>†,‡,⊥,\*</sup> Yuehe Lin<sup>†,‡,⊥,\*</sup>*

<sup>†</sup> Key Laboratory of Pesticide and Chemical Biology, Ministry of Education, College of Chemistry, Central China Normal University, Wuhan 430079, P. R. China

<sup>‡</sup> School of Mechanical and Materials Engineering, Washington State University, PO Box 642920 Pullman, Washington 99164, United States

<sup>§</sup> Institute for Interdisciplinary Research & Key Laboratory of Optoelectronic Chemical Materials and Devices, Ministry of Education, Jiangnan University, Wuhan 430056, P. R. China

<sup>⊥</sup> Paul G. Allen School for Global Animal Health, Washington State University, PO Box 647090 Pullman, Washington 99164, United States

#### **Corresponding Author**

\*Email: [dan.du@mail.ccnu.edu.cn](mailto:dan.du@mail.ccnu.edu.cn)

[yuehe.lin@wsu.edu](mailto:yuehe.lin@wsu.edu)



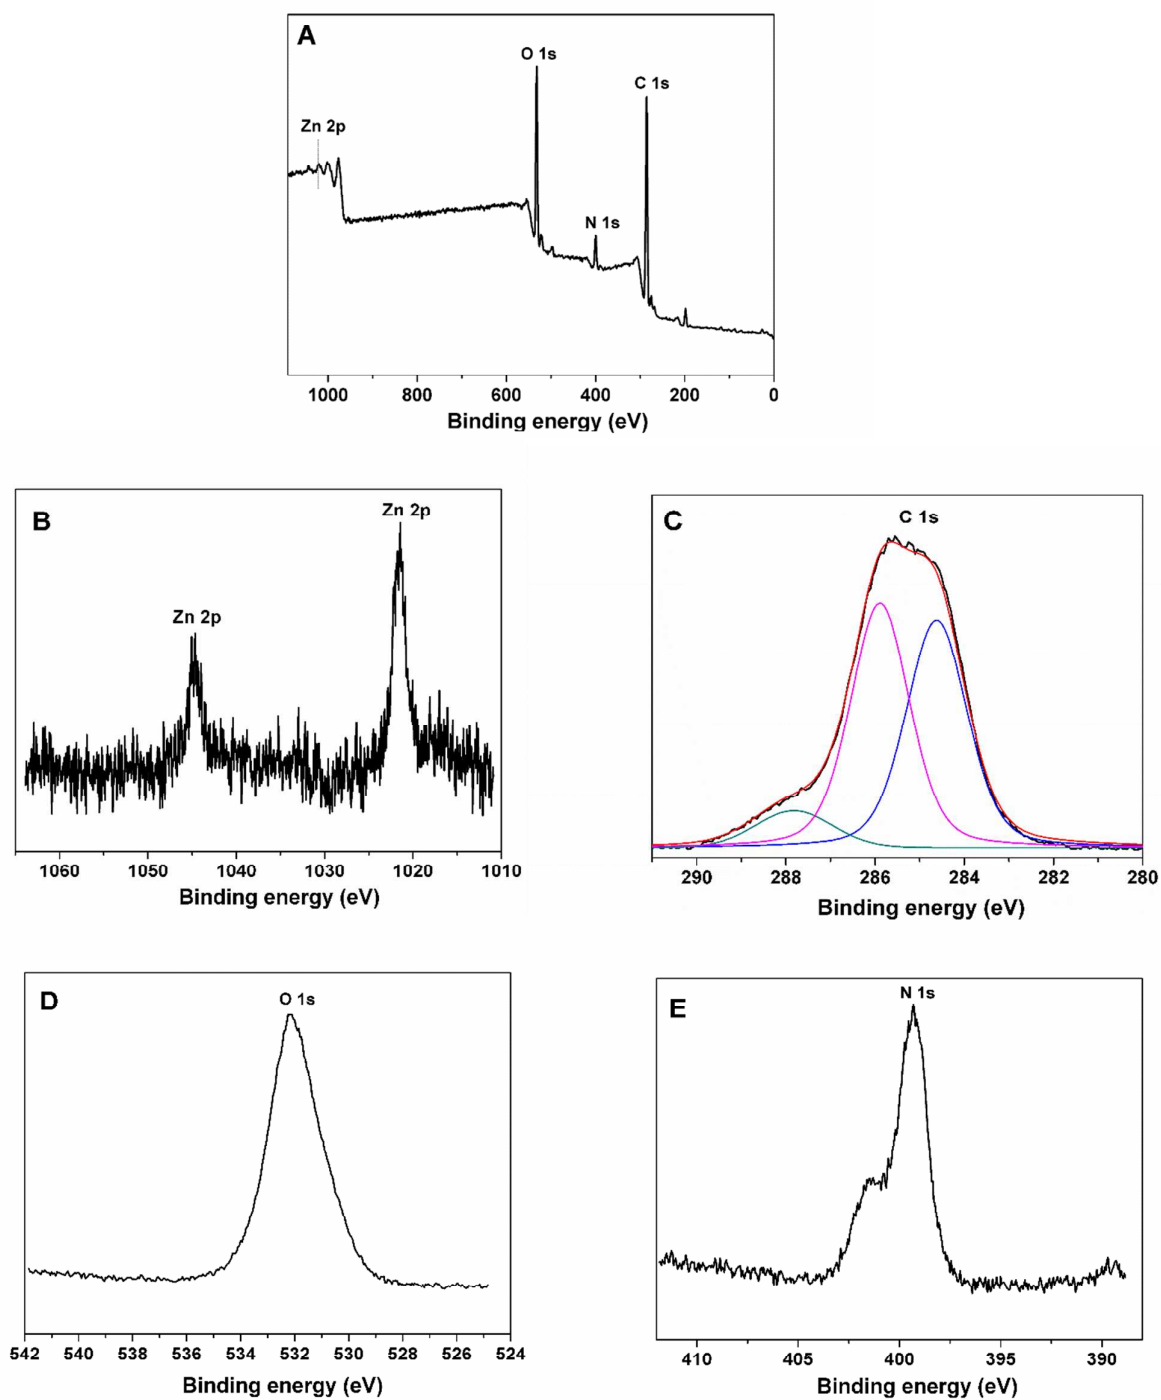

**Figure S1.** XPS spectrum of PEG-ZnO. (A) full survey spectrum, (B) Zn 2p peak, (C) C 1s peak, (D) O 1s peak, (E) N 1s peak.

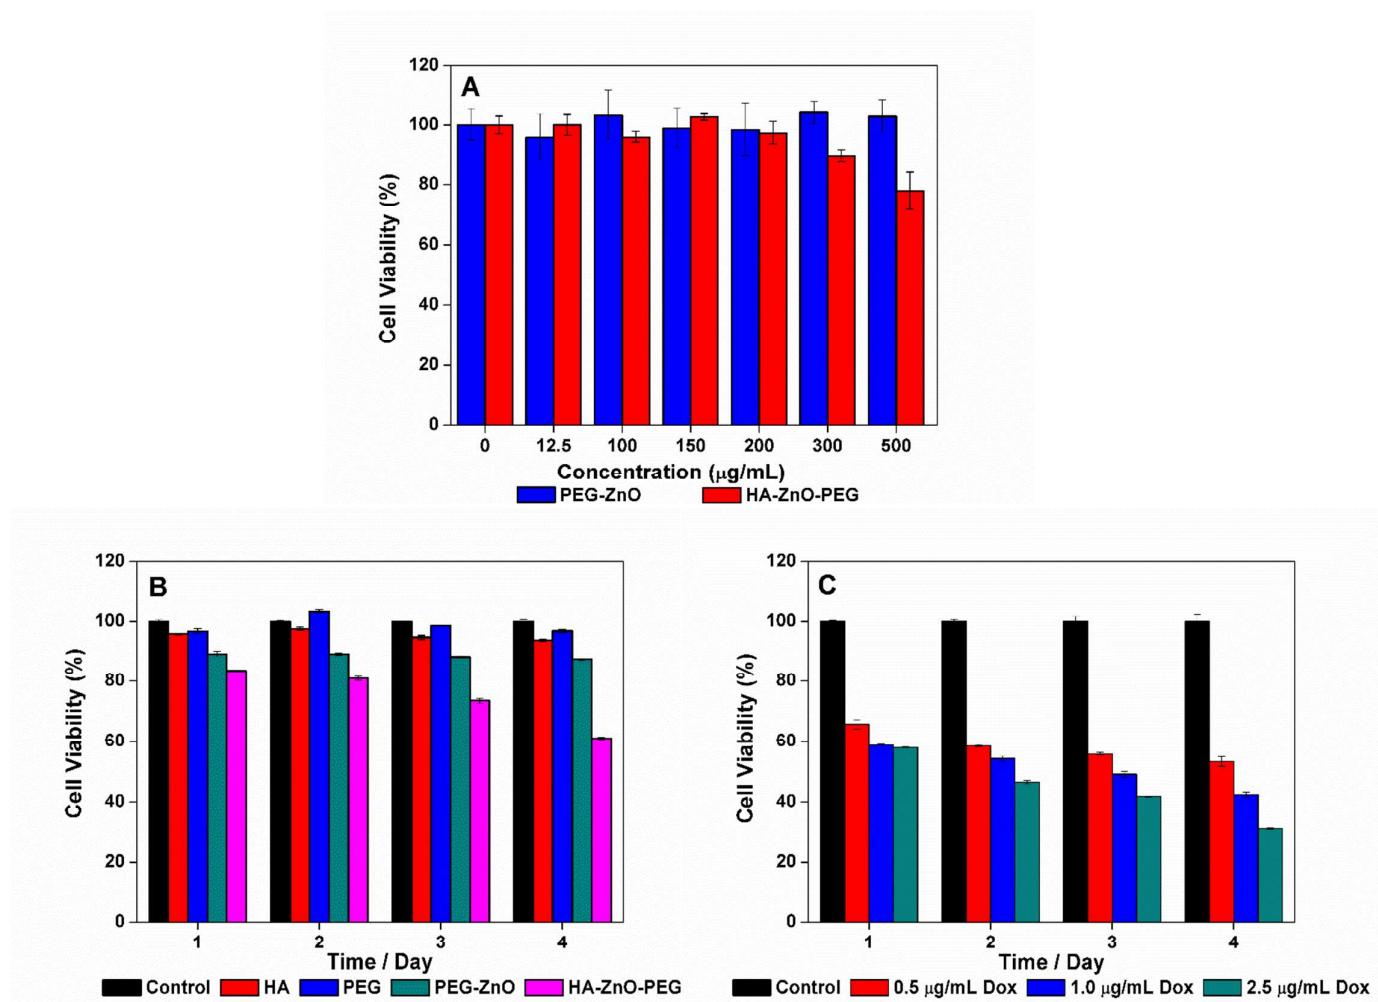

**Figure S2.** Cytotoxicity assay of A549 cells in the presence of different concentrations of (A) PEG-ZnO and HA-ZnO-PEG. (B) Cytotoxicity assay of A549 cells with time in the presence of 250  $\mu\text{g/mL}$  of HA, PEG, PEG-ZnO and HA-ZnO-PEG. (C) Cytotoxicity assay of A549 cells with time in the presence of different concentrations of HA-ZnO-DOX with 0.5  $\mu\text{g/mL}$  of DOX, HA-ZnO-DOX with 1.0  $\mu\text{g/mL}$  of DOX and HA-ZnO-DOX with 2.5  $\mu\text{g/mL}$  of DOX, which confirms a sustained

release process and a controlled release behavior of HA-ZnO-DOX

| Materials            | Zeta potential (mV) |
|----------------------|---------------------|
| NH <sub>2</sub> -ZnO | 27.4                |
| ZnO-PEG-COOH         | -0.0521             |
| ZnO-PEG-COOH+HA      | -1.90               |

system.

**Table S1.** Zeta potential values of ZnO conjugates.
